# Supplementary material for: Ratiometric temperature measurement using negative thermal quenching of intrinsic BiFeO3 semiconductor nanoparticles
Source: Royal Society of Chemistry journal article supplement (doi:10.1039/d0ra01896a), 2020-01-01
Supplement: d0ra01896a1.pdf [file d0ra01896a1.pdf]

## Electronic Supplementary Material

### RATIOMETRIC TEMPERATURE MEASUREMENT USING NEGATIVE THERMAL QUENCHING OF INTRINSIC BiFeO<sub>3</sub> SEMICONDUCTOR NANOPARTICLES

Željka Antić<sup>\*,a</sup>, K. Prashanthi<sup>\*,b</sup>, Sanja Kuzman<sup>a</sup>, Jovana Periša<sup>a</sup>, Zoran Ristić<sup>a</sup>, V.R. Palkar<sup>c</sup> and Miroslav D. Dramićanin<sup>a</sup>

<sup>a</sup>University of Belgrade, Vinča Institute of Nuclear Sciences, P.O. Box 522, Belgrade, Serbia

<sup>b</sup>University of Alberta, Department of Chemical & Materials Engineering, Edmonton, Canada

<sup>c</sup>Indian Institute of Technology Bombay (IIT-B), Mumbai, India

E-mail: zeljkaa@gmail.com, kovur@ualberta.ca

#### X-Ray Photoelectron Spectroscopy (XPS)

The X-Ray Photoelectron Spectroscopy (XPS) measurements of BFO NPs were performed on AXIS 165 spectrometer (Kratos Analytical). The survey scans were collected for binding energy spanning from 1000 eV to 0 with an analyzer pass energy of 160 eV and a step of 0.4 eV. For the high-resolution spectra, the pass-energy was 20 eV with a step of 0.1 eV. Electron flood neutralizer was applied to compensate for sample charging. The survey spectrum of pure BFO NPs (Figure S1a) confirms the presence of Bi, Fe, and O elements. The main peak at ~529 eV is attributed to the cation oxygen bonds. The peak at ~532 eV corresponds to the presence of oxygen vacancies. The presence of mixed-valence states Fe<sup>3+</sup> and Fe<sup>2+</sup> in BFO NPs was revealed by XPS spectra (Figure S1b) which shows two peaks ~ 710 eV and 724 eV indicating that Fe is dominantly in 3+ state. Further, due to the different d orbital electron configuration, the satellite peaks at 8 eV above these peaks indicate the presence of both Fe<sup>2+</sup> and Fe<sup>3+</sup> cations. The presence of mixed states is an indicative of the presence of oxygen vacancies (defect states) in the sample.

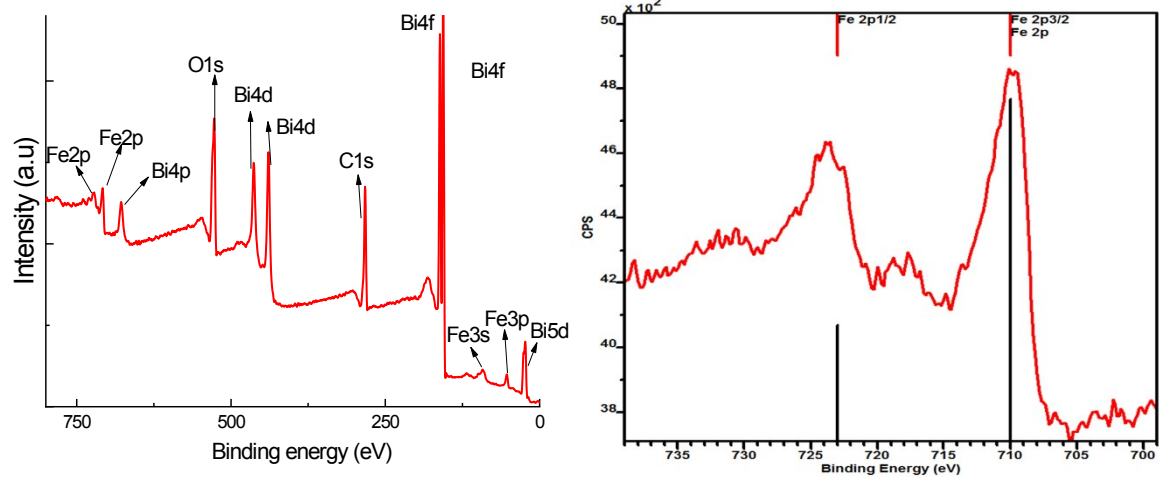

**Figure S1** XPS spectra of pure BFO NPs showing: a) the survey spectrum and b) the presence of mixed  $\text{Fe}^{3+}$  and  $\text{Fe}^{2+}$  valence states
